# Supplementary material for: Fabrication of innovative ZnO nanoflowers showing drastic biological activity
Source: Royal Society of Chemistry journal article supplement (doi:10.1039/c5nj02391b), 2015-12-16
Supplement: c5nj02391b1.pdf [file c5nj02391b1.pdf]

## **Supporting information**

### **Fabrication of innovative ZnO nanoflowers showing drastic biological activity**

**Vinay Sharma,<sup>1</sup> Akbar Mohammad,<sup>2</sup> Veenu Mishra,<sup>2</sup> Archana Chaudhary,<sup>2</sup> Kshipra Kapoor<sup>2</sup> and Shaikh M.Mobin,<sup>\*1, 2, 3</sup>**

<sup>1</sup>Centre for Biosciences and Bio-Medical Engineering, Indian Institute of Technology Indore, Khandwa Road, Indore 452017, India.

<sup>2</sup>School of Basic Sciences, Discipline of Chemistry, Indian Institute of Technology Indore, Khandwa Road, Indore 452017, India.

<sup>3</sup>Material Science and Engineering, Indian Institute of Technology Indore, Khandwa Road, Indore 452017, India.

Email:[xray@iiti.ac.in](mailto:xray@iiti.ac.in)

Table S1. Selected bond lengths (Å) and bond angles(°) of **1**.

| <b>Bond distance</b> | <b>(Å)</b> |
|----------------------|------------|
| Zn(1)-O(3)           | 2.064(3)   |
| Zn(1)-N(1)           | 2.069(4)   |
| Zn(1)-N(2)           | 2.080(4)   |
| Zn(1)-O(2)           | 2.167(3)   |
| Zn(1)-O(1)           | 2.172(3)   |
| Zn(1)-Cl(1)          | 2.4977(13) |
| Zn(2)-Cl(4)          | 2.2405(13) |
| Zn(2)-Cl(3)          | 2.2414(14) |
| Zn(2)-Cl(2)          | 2.2872(13) |
| Zn(2)-Cl(1)          | 2.3284(12) |
|                      |            |
| <b>Bond angle(Å)</b> | <b>(°)</b> |
| O(3)-Zn(1)-N(1)      | 101.87(14) |
| O(3)-Zn(1)-N(2)      | 93.98(14)  |
| N(1)-Zn(1)-N(2)      | 160.97(15) |
| O(3)-Zn(1)-O(2)      | 170.17(13) |
| N(1)-Zn(1)-O(2)      | 87.57(13)  |
| N(2)-Zn(1)-O(2)      | 76.25(13)  |
| O(3)-Zn(1)-O(1)      | 86.54(14)  |
| N(1)-Zn(1)-O(1)      | 76.99(14)  |
| N(2)-Zn(1)-O(1)      | 93.71(13)  |
| O(2)-Zn(1)-O(1)      | 93.03(13)  |
| O(3)-Zn(1)-Cl(1)     | 91.29(11)  |
| N(1)-Zn(1)-Cl(1)     | 97.01(11)  |
| N(2)-Zn(1)-Cl(1)     | 93.06(11)  |
| O(2)-Zn(1)-Cl(1)     | 90.23(10)  |
| O(1)-Zn(1)-Cl(1)     | 173.02(9)  |
| Cl(4)-Zn(2)-Cl(3)    | 112.57(5)  |
| Cl(4)-Zn(2)-Cl(2)    | 110.31(5)  |
| Cl(3)-Zn(2)-Cl(2)    | 112.49(5)  |
| Cl(4)-Zn(2)-Cl(1)    | 108.70(5)  |
| Cl(3)-Zn(2)-Cl(1)    | 107.83(5)  |
| Cl(2)-Zn(2)-Cl(1)    | 104.52(5)  |
| Zn(2)-Cl(1)-Zn(1)    | 119.47(5)  |

Table S2. Selected bond lengths (Å) and bond angle(°) of **2**.

| <b>Bond distance</b> | <b>(Å)</b> |
|----------------------|------------|
| Zn(1)-N(1)           | 2.025(3)   |
| Zn(1)-O(1)           | 2.208(3)   |
| Zn(1)-Cl(1)          | 2.2504(17) |
| Zn(1)-Cl(2)          | 2.2782(11) |
| Zn(1)-Cl(2)#1        | 2.6062(10) |
|                      |            |
| <b>Bond angle</b>    | <b>(°)</b> |
| N(1)-Zn(1)-O(1)      | 83.13(11)  |
| N(1)-Zn(1)-Cl(1)     | 114.53(9)  |
| O(1)-Zn(1)-Cl(1)     | 94.37(8)   |
| N(1)-Zn(1)-Cl(2)     | 124.89(9)  |
| O(1)-Zn(1)-Cl(2)     | 90.62(8)   |
| Cl(1)-Zn(1)-Cl(2)    | 120.54(5)  |
| N(1)-Zn(1)-Cl(2)#1   | 88.57(8)   |
| O(1)-Zn(1)-Cl(2)#1   | 167.39(7)  |
| Cl(1)-Zn(1)-Cl(2)#1  | 97.72(4)   |
| Cl(2)-Zn(1)-Cl(2)#1  | 86.33(4)   |
| Zn(1)-Cl(2)-Zn(1)#1  | 93.67(4)   |

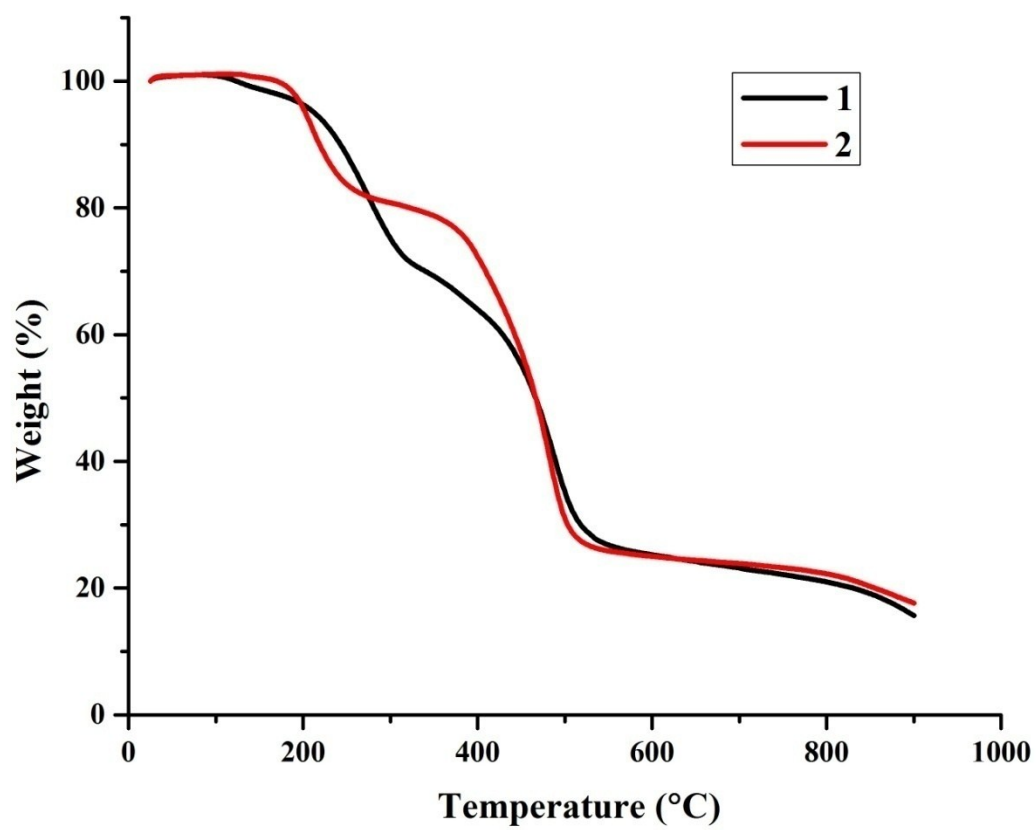

**Fig. S1** Two step thermal decomposition of complexes 1 and 2.

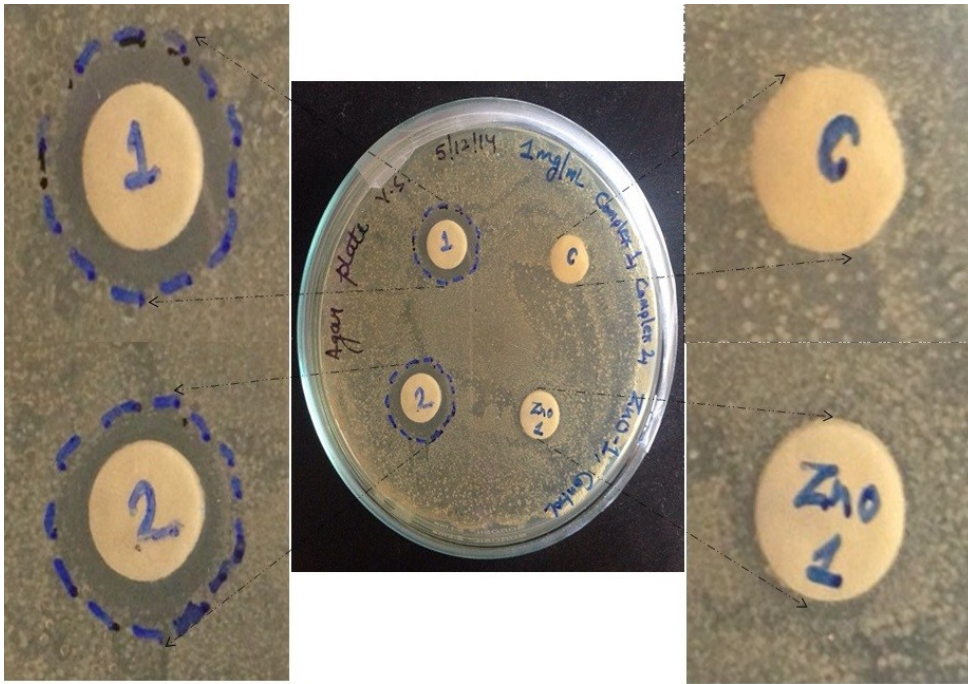

**Fig. S2** Zone of inhibition formed by **1**, **2** and **ZnO-1** at 1000  $\mu\text{g}/\text{mL}$  in Disc diffusion test.

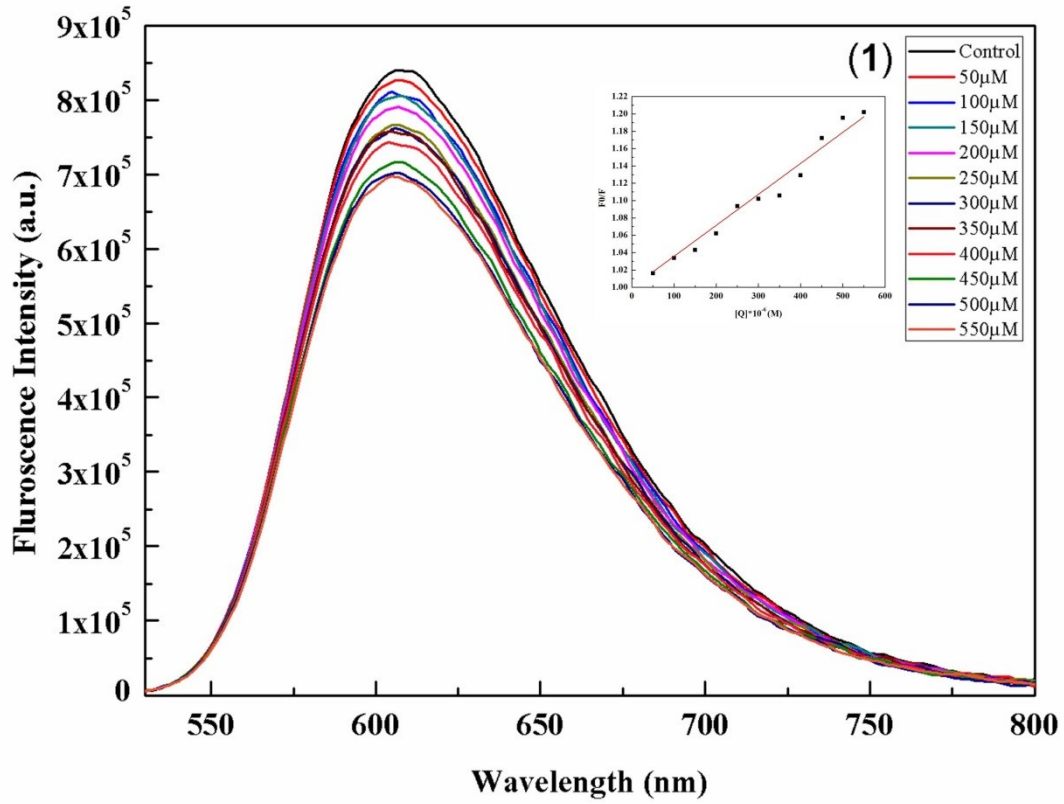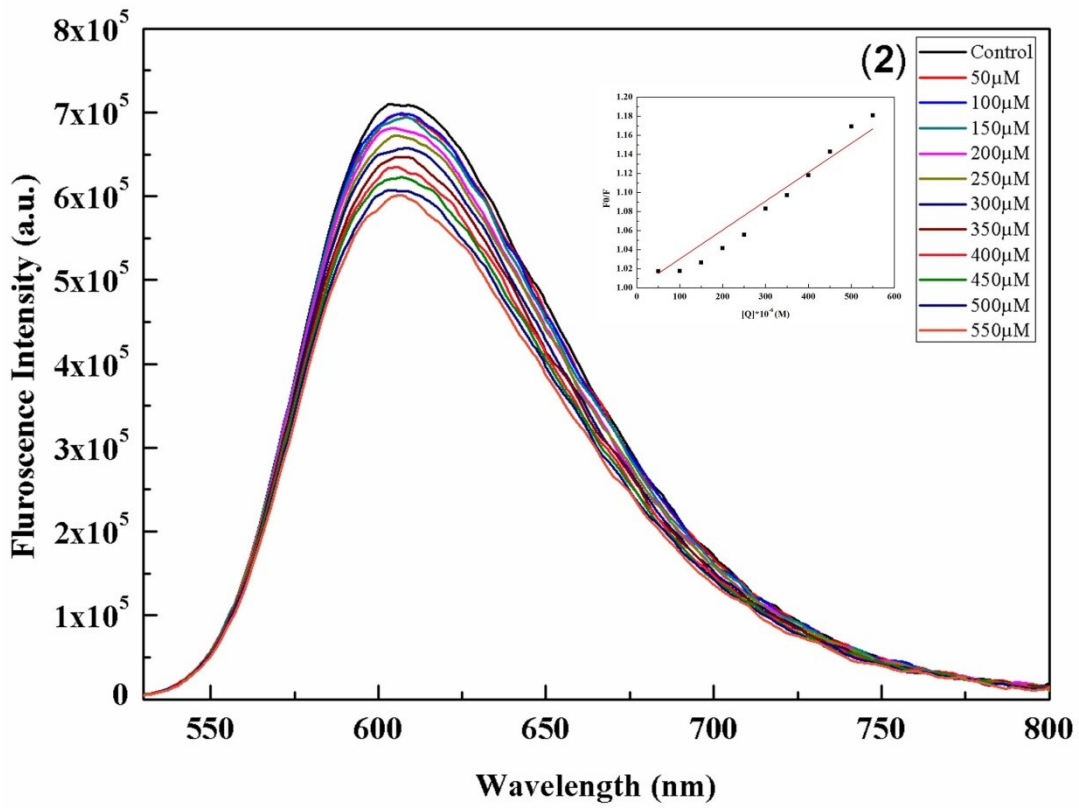

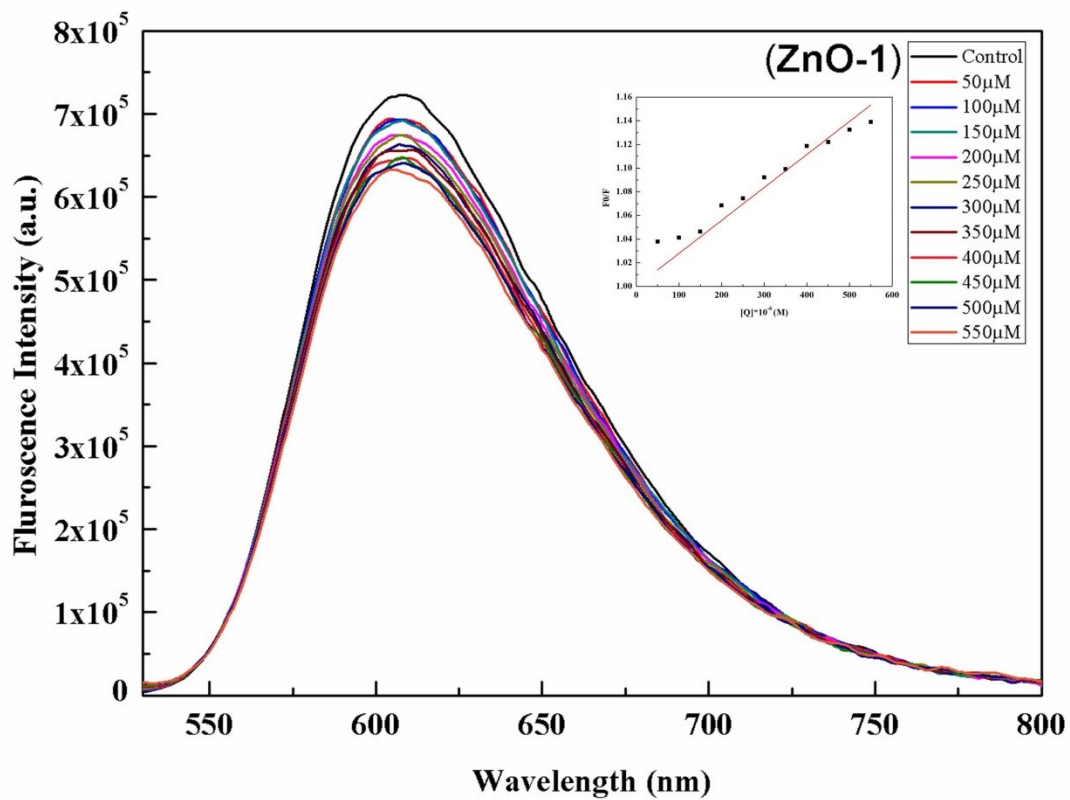

**Fig.S3** Fluorescence quenching of CT-DNA+ EtBr by **1**, **2** and **ZnO-1**. Inset showing Stern-Volmer plots.

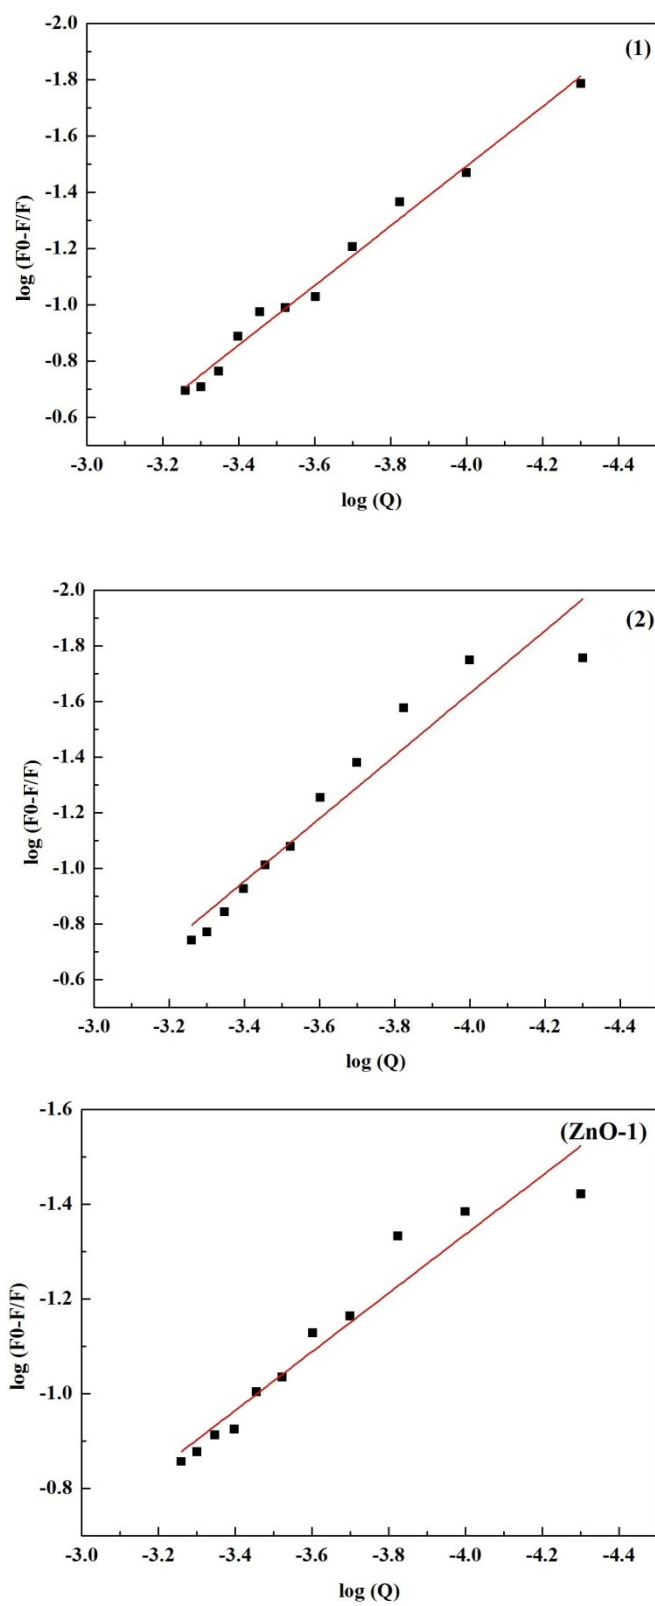

**Fig. S4** Scatchard plots for fluorescence quenching of CT-DNA+ EtBr by 1, 2 and ZnO-1.
